# Supplementary material for: The Influence of the Precursor’s Nature and Drying Conditions on the Structure, Morphology, and Thermal Properties of TiO2 Aerogels
Source: MDPI journal article supplement (doi:10.3390/gels8070422), 2022-07-06
Supplement: s1 [file s1]

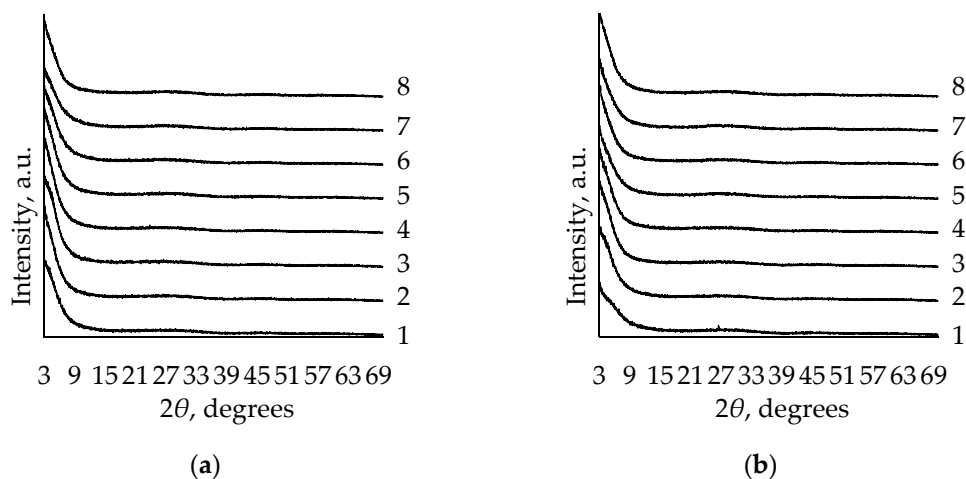

**Figure S1.** XRD patterns of TiO<sub>2</sub> aerogels after subcritical drying (800 mbar, 70 °C, 8 h) without aging (1-4) and after 72 h of aging (5-8) depending on the precursor type (TIP (a), TBOT (b)) and the solvent used for additional solvent exchange (1, 5 – without exchange; 2, 6 – CH; 3, 7 – nH; 4, 8 – DE).

**Table S1.** Details of STA curves that are typical for TiO<sub>2</sub> aerogel organic groups decomposition.

| Precursor | Aging duration, h | Solvent | Peak characteristics    |                       |                       | Heat of process, J/g | Mass loss, % | Total mass loss, % |
|-----------|-------------------|---------|-------------------------|-----------------------|-----------------------|----------------------|--------------|--------------------|
|           |                   |         | T <sub>onset</sub> , °C | T <sub>max</sub> , °C | T <sub>end</sub> , °C |                      |              |                    |
| TIP       | 0                 | -       | 234.8                   | 255.2                 | 292.0                 | 205.34               | 4.544        | 31.427             |
|           |                   | CH      | 225.1                   | 262.2                 | 299.5                 | 735.42               | 4.239        | 28.249             |
|           |                   | nH      | 228.9                   | 262.2                 | 297.0                 | 843.01               | 6.386        | 32.275             |
|           |                   | DE      | 224.9                   | 264.3                 | 300.5                 | 732.87               | 2.871        | 25.259             |
|           | 72                | -       | 231.9                   | 247.9                 | 288.8                 | 199.09               | 2.867        | 27.135             |
|           |                   | CH      | 229.5                   | 254.4                 | 299.5                 | 376.81               | 2.251        | 29.083             |
|           |                   | nH      | 230.6                   | 248.5                 | 288.4                 | 261.28               | 2.934        | 25.207             |
|           |                   | DE      | 227.3                   | 254.2                 | 294.0                 | 492.27               | 3.998        | 28.680             |
| TBOT      | 0                 | -       | 225.9                   | 264.9                 | 305.7                 | 599.08               | 6.634        | 35.166             |
|           |                   | CH      | 226.5                   | 263.1                 | 301.5                 | 932.41               | 5.948        | 30.748             |
|           |                   | nH      | 231.2                   | 268.9                 | 308.1                 | 954.61               | 5.067        | 31.676             |
|           |                   | DE      | 226.6                   | 262.3                 | 299.3                 | 889.02               | 5.228        | 30.909             |
|           | 72                | -       | 224.5                   | 260.4                 | 298.4                 | 886.73               | 4.771        | 27.560             |
|           |                   | CH      | 225.0                   | 259.8                 | 300.0                 | 750.26               | 3.655        | 29.826             |
|           |                   | nH      | 225.2                   | 254.5                 | 291.2                 | 597.11               | 3.825        | 28.518             |
|           |                   | DE      | 225.3                   | 254.1                 | 294.6                 | 602.89               | 4.336        | 30.118             |
